# Supplementary material
Source: ML conference proceedings conference paper supplement (https://aclanthology.org/D19-1366)
Supplement: Attachment [file D19-1366.Attachment.zip]

Archive with 1 entries (1 files):
- text_style_transfer__EMNLP_short_ver_camera_ready_appendix_20190831.pdf
